# Supplementary material
Source: publisher site journal article supplement (https://www.dovepress.com/article/244329)
Supplement: Supplementary file 1 [file get_supplementary_file.php]

**SUPPLEMENT**

**A Real-World Study Using Claims Data to Evaluate Possible Failure of Opioid Treatment Regimens Among Patients With Hip and/or Knee Osteoarthritis in the US**

Kavita Gandhi, BS Pharm, MS,1,* Wenhui Wei, PhD, MBA,2 Ahong Huang, MS,3
Li Wang, PhD, MBA,3 Ravi Iyer, PhD, MBA,1 Nathaniel P. Katz, MD, MS4,5

1Teva Pharmaceutical Industries, Frazer, PA, USA; 2Regeneron Pharmaceuticals, Tarrytown, NY, USA; 3STATinMED Research, Dallas, TX, USA; 4Analgesic Solutions, Natick, MA, USA; 5Tufts University School of Medicine, Boston, MA, USA

*Kavita Gandhi was an employee of Teva Pharmaceuticals at the time of this study.

**Table S1** International classification of diseases codes used for identifying the study population.

| **Diagnosis** | **ICD-9 Code** | **ICD-10 Code** |
| --- | --- | --- |
| Osteoarthritis of the knee or hip | 715.15, 715.25, 715.35, 715.95, 715.16, 715.26, 715.36, 715.96 | M160, M1610, M1611, M1612, M162, M1630, M1631, M1632, M164, M1650, M1651, M1652, M166, M167, M169, M170, M1710, M1711, M1712, M172, M1730, M1731, M1732, M174, M175  M179 |
| Osteoarthritis unspecified | 715.18, 715.28, 715.38, 715.98, 715.09, 715.89, 715.00, 715.10, 715.20, 715.30, 715.80, 715.90 | M1991, M1992, M1993, M1990, M150, M153, M158, M150, M159, M1991, M1992, M1993, M1990, M154, M158, M159, M1990 |
| Pain in the knee or hip | 719.45, 719.46 | M25551, M25552, M25559  M25561, M25562, M25569 |

Abbreviations: ICD-9-CM, International Classification of Diseases, Ninth Revision, Clinical Modification; ICD-10-CM, International Classification of Diseases, Tenth Revision,

Clinical Modification.

**Table S2** Codes used to identify outcomes relevant to the definitions of opioid regimen failure.a

| **CPT Codes identifying joint surgery (including 1st replacement, resurfacing, and revision surgery)** | **Description** | |
| --- | --- | --- |
| 27445 | Arthroplasty, knee, hinge prosthesis (e.g., Walldius type) | |
| 27446 | Arthroplasty, knee, condyle and plateau; medial OR lateral compartment | |
| 27447 | Arthroplasty, knee, condyle and plateau; medial AND lateral compartments with or without patella resurfacing (total knee arthroplasty) | |
| 27486 | Revision of total knee arthroplasty, with or without allograft; 1 component | |
| 27487 | Revision of total knee arthroplasty, with or without allograft; femoral and entire tibial component | |
| 27120 | Acetabuloplasty; (e.g., Whitman, Colonna, Haygroves, or cup type) | |
| 27122 | Acetabuloplasty; resection, femoral head (e.g., Girdlestone procedure) | |
| 27125 | Hemiarthroplasty, hip, partial (e.g., femoral stem prosthesis, bipolar arthroplasty) | |
| 27130 | Arthroplasty, acetabular and proximal femoral prosthetic replacement (total hip arthroplasty), with or without autograft or allograft | |
| 27132 | Conversion of previous hip surgery to total hip arthroplasty, with or without autograft or allograft | |
| 27134 | Revision of total hip arthroplasty; both components, with or without autograft or allograft | |
| 27137 | Revision of total hip arthroplasty; acetabular component only, with or without autograft or allograft | |
| 27138 | Revision of total hip arthroplasty; femoral component only, with or without allograft | |
| **Codes identifying opioid-abuse related events** | **Description** | |
| ICD-9-CM codes: 304.0x, 304.7x, 305.5x. (ICD-10-CM codes: F11, F11.1, F11.15, F11.14, F11.12, F11.10). | Opioids abuse disorder (dependence/abuse) | |
| ICD-9-CM codes: 965.00, 965.01, 965.02, 965.09, E850.0, E850.1, E850.2, 965.0. (ICD-10-CM: T40.0, T40.1, T40.2, T40.3, T40.4, X42, X62, Y12). | Opioids poisoning/overdose | |
| HCPCS Code: J2310 | Naloxone | |
| HCPCS Code: J2315 | Naltrexone | |
| **HCPCS procedure codes identifying intra-articular hyaluronic acid injection** | **Description** | |
| J7323A28:A36A28:A38A1A2A28:A36 | Hyaluronan or derivative, euflexxa, for intra-articular injection, per dose | |
| J7326 | Hyaluronan or derivative, gel-one, for intra-articular injection, per dose | |
| J7327 | Hyaluronan or derivative, monovisc, for intra-articular injection, per dose | |
| J7324 | Hyaluronan or derivative, orthovisc, for intra-articular injection, per dose | |
| J7322 | Hyaluronan or derivative, synvisc, for intra-articular injection, per dose | |
| J7325 | Hyaluronan or derivative, synvisc or synvisc-one, for intra-articular injection, | |
| J7321 | Hyaluronan or derivative, hyalgan or supartz, for intra-articular injection, per | |
| J7322 | Hyaluronan or derivative, synvisc, for intra-articular injection, per dose | |
| J7323 | Hyaluronan or derivative, euflexxa, for intra-articular injection, per dose | |
| J7324 | Hyaluronan or derivative, orthovisc, for intra-articular injection, per dose | |
| J7325 | Hyaluronan or derivative, synvisc or synvisc-one, for intra-articular injection, | |
| J7326 | Hyaluronan or derivative, gel-one, for intra-articular injection, per dose | |
| J7327 | Hyaluronan or derivative, monovisc, for intra-articular injection, per dose | |
| **HCPCS codes for intraarticular corticosteroid injections** | **Description** | |
| J0702 | Betamethasone | |
| J0704 |
| C9256 | Dexamethasone | |
| J1094 |
| J1100 |
| J7312 |
| J1020 | Methylprednisolone | |
| J1030 |
| J1040 |
| J2920 |
| J2930 |
| J3300 | Triamcinolone | |
| J3301 |
| J3302 |
| J3303 |
| **NDC identifying intra-articular** **hyaluronic acid injection** | **Description** | |
| **Product name** | **Generic name** |
| 35356003501 | ORTHOVISC | Hyaluronic acid |
| 35356003502 |
| 00008914901 | SYNVISC | Hylan polymers A and B |
| 00008914902 |
| 54569477100 |
| 68115053503 |
| 68258893503 |
| 68258893506 | SYNVISC ONE |
| 08911485003 | SOLESTA | Dextranomer/hyaluronate Sodium |
| 08024072416 | HYALGAN | Hyaluronate sodium |
| 18837026502 |
| 54569554300 |
| 89122072412 |
| 89122072420 |
| 35356003602 | SUPARTZ |
| 89130555501 |

Abbreviations: CPT, Common Procedural Technology; HCPCS, Healthcare Common Procedure Coding System; NDC, National Drug Code

aNDC codes used to identify intraarticular corticosteroid injections and non-opioid medications for pain management available on reasonable request
